# Supplementary material
Source: PubMed Central journal article supplement (PMC2849448)
Supplement: supp_192_8_2266__1.pdf [file supp_192_8_2266__1.pdf]

## **Supplementary material**

**Table S1:** Proteins with serine rich domains

**Fig. S1:** Distribution in functional categories of the genes with non streptococcal best BlastP hits. In blue: absolute number, in red: percentage as compared to the total number of genes in the respective functional category.

**Fig. S2:** Distribution in functional categories of the genes with no ortholog among the 10 sequenced species of *Streptococcus* but with a streptococcal best BlastP hit. In blue: absolute number, in red: percentage compared to the total number of genes in the respective functional category.

**Fig. S3:** Phylogenetic relationship of RibA and RibD protein sequences with representative sequences from Gram positive bacteria. A. RibA; B. RibD. The two trees show similar topologies. The streptococcal proteins are boxed. *S. gallolyticus* proteins cluster with *Lactobacillus reuterii* orthologs, *S. pneumoniae* with *Bifidobacterium longum* and *S. agalactiae* represents a separate branch. The scale bar represents 0.2 substitutions per site. The numbers at the branches are posterior probabilities indicating the support for the branch. GI numbers for sequences are given in parentheses.

**Table S1.** Proteins with serine rich domains

| Protein                                       | Specificity or activity <sup>1</sup> | Signal peptides and serine rich domains <sup>2</sup>                                      |
|-----------------------------------------------|--------------------------------------|-------------------------------------------------------------------------------------------|
| <b>Lipoproteins ABC transporter component</b> |                                      |                                                                                           |
| Gallo_0116                                    | Sugars                               | MTMTKLT <del>TKIKLWLSVLVLL</del> LSACVGGYVYYQM <del>QK</del> TILKIGVYAG                   |
| Gallo_0122                                    |                                      | MKRNMAAIMALMLAVLT <del>LF</del> GCSSSKSTSDDV <del>I</del> HIGIL                           |
| Gallo_0163                                    | sugars                               | MKKGLLTIGMTALAAVTLVGCSSGSSDSDVETITFINH                                                    |
| Gallo_0192                                    | multiple sugars                      | MKWRKQLIAAGIVALATTAGLILTACSKEDDTSADGKVTIEY                                                |
| Gallo_0324                                    | oligopeptide                         | MLLKSKT <del>WKRI</del> GLGAVTLVSAAVLAACGGSSSSSSSSSDEINWYTPTEIS                           |
| Gallo_0414                                    | amino acids                          | MKKRRLLSFGFLFLLTLAACS <del>NQ</del> SQSSGKTVIKVATD                                        |
| Gallo_0754                                    | sugar                                | MKIKTLSAISLTVIPSLILANFCHFPSSQTNSTGESSIFNGELEE <del>G</del> AVI                            |
| Gallo_0874                                    | ferichrome                           | MKKKLTLLLTAMMVLVMAVFLGACSSSSSSNSTSQSSDASE                                                 |
| Gallo_1000                                    | amino acids                          | MKFKKVL <del>MGALALV</del> STLTLAACSSSSSKKATSTDQWD <del>T</del> YVK                       |
| Gallo_1136                                    |                                      | MNKKIVGLGLAAVATLALGACSR <del>NS</del> SSSSSSDSSVKA <del>I</del> IVTDTG                    |
| Gallo_1136                                    |                                      | MKTKQTLLYSVCALTLLSLGACSQTSSTSSSTSSSSSTVASTTSA                                             |
| Gallo_1149                                    | phosphate                            | MKKMKKLSFLLLLITSVSIILSGCASWIDKQ <del>S</del> ITSVGST                                      |
| Gallo_1234                                    | amino acids                          | MKIVKRFLAIVSLLVVVLVGCSTSKSSSSTSSSSSSSGNTAKARTL                                            |
| Gallo_1392                                    | amino acids                          | MKIKKIFLGVLALISVLTLAACGSSSNENLQEKIVK                                                      |
| Gallo_1394                                    | amino acids                          | MKKFFRRFILLIIVGSLSACSSSTGVSQSSIQDKG<br>267-TYTQSSSSSDEZ                                   |
| Gallo_1395                                    | amino acids                          | MK <del>V</del> SKLFGGLAVVVASLFLLSACGSSSEDT <del>S</del> VSDIKDK<br>284-AYELSVSDSSDSSDSDZ |
| Gallo_1399                                    | maltose                              | MKKN <del>T</del> WKKMVLGAGLTLAGSVLVACSNSSSNSSSSSSSKTIK <del>L</del> WVPTGAKE             |
| Gallo_1412                                    |                                      | MEIK <del>N</del> WKR <del>V</del> GLGAVTLLSAAVLAACGNSSSSSSSSSDEINWFIPTEISTLDISK          |
| Gallo_1413                                    |                                      | MEFKSTWKR <del>V</del> GLGVVSLASAALLAACGNSSSSSSSSNEINWYTPTEILTLDISK                       |
| Gallo_1760                                    | amino acids                          | MHKKIALTALTFLASIALAACSKSPDVTANATGTTIG                                                     |

|            |             |                                                                           |
|------------|-------------|---------------------------------------------------------------------------|
| Gallo_1772 | iron        | MKKFFAVLTTFLATFLLVACHNTSSTSDDETELSSMPKITGFSYE                             |
| Gallo_1844 |             | MKLKFLFGLASVAFASVLLAACGSSSSSSSSDDTTLKVGIMTLD<br>293-DGADIPAWDGATTSSSSSDDZ |
| Gallo_1845 | amino acids | MKKILGVTGVALASTTFLAACSSSSSSSSSSSGKEEVVFATVGTTA                            |
| Gallo_1966 | phosphate   | MKKWKMLMLLVFVGVGVVLTACSKSNSSESKQISVVSRE                                   |
| Gallo_2047 | manganese   | MKKITSLICLLLIICILGACATTRTSEKNKLNVVVVTNSILSDITQNIK                         |
| Gallo_2130 | metal ion   | MKKKVLIVTGFVATILTGCGASQVATSSSTSDSNVVIKVGANITPHAEILEEA                     |

### Other lipoproteins

---

|            |                           |                                                                                                         |
|------------|---------------------------|---------------------------------------------------------------------------------------------------------|
| Gallo_0624 |                           | MKKSCKITVTLCSVLLLGACSKKEKSSQVSTSHSKVTQVSKSSIK                                                           |
| Gallo_0696 |                           | MKKTVTYLALAATSVLFLTACSNNNQESTNTSSSSSTSSSEETTGGGFVT                                                      |
| Gallo_0751 |                           | MKKGFIILTIAALSFTLTACSONSQTSSSSGTSTSEVSSNKVTTY                                                           |
| Gallo_0883 |                           | MKKLGCFILVMMLLVLSACSSVQDNQAKQTQTTTTSKTEEEKMVT                                                           |
| TanA       | tannase                   | MPRKKWFFTSSAVLLCSAMLTACSSSSNSSTSSSSSQNTTAST                                                             |
| Gallo_1117 |                           | MKTKQTLLYSVCALTLLSLGACSQTSSTSTSSSSSTVASTTSASTS                                                          |
| Gallo_1367 |                           | MKKKLRCYLTLLLSLGLAACSTHSQNNTNQSSSSTTVSSSVKKSTNSSET<br>STSTGSSESEEEASSTESSSTSTHSQNNTNQSSSSTTVSSSVKKSTNSS |
| Gallo_1245 |                           | MKKIAIFVLSVVSFLVVGCSNSTSGGFSNLPDHLGDNKAVSNLAGAGVTYN                                                     |
| Gallo_1586 |                           | MKKGILFFVSVLAVLAACSNSTGKQESSKQTNESQSSYYQVTSDDISITKDA                                                    |
| Gallo_1601 |                           | MKLVVFLGVMLVSI FALAACSTNSSSSKSKTTTTINGTKY                                                               |
| Gallo_1710 |                           | MKKKLLVALLAVMSVFLLVGCSSKDDLKSGKYYGINYN                                                                  |
| Gallo_1717 | Peptidyl-prolyl isomerase | MKKFWSFGLMVLCLASLGCESITRAIRGDDYVDAKIAASSSEAAASASASASSSK                                                 |
| Gallo_1778 |                           | MKKLVLLGTMILLSGCSKKSQSVSGSWYTNSETISSSSSTVSQTESNEE                                                       |
| Gallo_1814 |                           | MKKKLNRVLFSGLSLSLLFLTGCVSRDSSGNPTGTIWHILGEPMAKLIQYFANNV                                                 |
| Gallo_1907 |                           | MKKRKFLGLSVLLLTI LAGCGADSELTDVSDIQTEINKDYSTESEMNIIMDIIS                                                 |

Gallo\_2214

MKKFATSIIILISLV**LVGCTH**STDSNSNSTKTSEAGQSQTIGEILNKDKRTIWYST

**Other proteins**

---

|            |                                 |                                                                                                                                                                                                       |
|------------|---------------------------------|-------------------------------------------------------------------------------------------------------------------------------------------------------------------------------------------------------|
| Gallo_0019 | Glucan binding                  | 309-AATV <b>TPTATTTTSSSSSSSSASSSSSSSSASTSSTASTSTSSSSSSSSSSSVNTY</b> PVG-358                                                                                                                           |
| PbpF -     | Penicillin-binding protein 2C   | 720-DLVY <b>STDDSTDTSSSSSSSSSDS</b> ILD-745                                                                                                                                                           |
| Gallo_0239 | D-ala d-ala carboxypermase      | 46- <b>SSTDSSSLVSESSTSTASATDLPDVSSSD</b> -76                                                                                                                                                          |
| Gallo_0388 |                                 | 1-MKTSRSEVTYLILSIILIAFGAGIYLIFGNNYASTSSSQTTTAV <b>SSSSSTSEEDLEANA</b>                                                                                                                                 |
| PonA -     | Penicillin-binding protein 1A   | 680-SG <b>SSNNYTYSSSTSSSVYSNIYGSSSSSSSEESTAESSSEDSSTESSNEADNNSDNSNTES</b> SDDZ                                                                                                                        |
| Gallo_0596 |                                 | 111-P <b>STTATSTSTSSSSSSSSTSETKTSST</b> -137                                                                                                                                                          |
| Gallo_0673 | Peptidylprolyl isomerase (2 TM) | 329-SILSQY <b>ATSSSSSSSSSSSSSSSSSSSSDDSSSSSSTEESSSTTES</b> SDEZ                                                                                                                                       |
| Gallo_0878 | <i>C. difficile</i> tcdC like   | 52- <b>SSSDSDDEEDYDYDDDDYSSSSSSSYSSSSSSSSSSSYSSSSSE</b> -97                                                                                                                                           |
| Gallo_1348 |                                 | 1-MSQKYSRRQK <b>SSSKNDKSAAPT</b> KHIKTGFSALQKTVALIGSILSIIVASITISNALKGSNSKT <b>TDKSTTTTTV</b><br>IKESDSDSKTDT <b>SASTYSSASANN</b> NYNSGNNNTYSSSSD <b>TTYSSSSATSQSSSTPSSD</b> TTSD <b>TTTTSSNTETTEZ</b> |
| Gallo_1358 | Polyglycerol P synthase         | 717-LFKAPSYMQLH <b>SSSSSSSSSSSSSSSSDGSZ</b>                                                                                                                                                           |
| Gallo_1363 |                                 | 75- <b>SSSSVSSSEASSSETTAETTTDESSTDASSDDTTESSSTGSGDTIT</b> -123                                                                                                                                        |
| Gallo_1899 |                                 | 50- <b>GGSSGGFSSGFSSGSSSSSSTSTSSGDGD</b> -78                                                                                                                                                          |
| Gallo_1903 | C-term domain of protein kinase | Several motifs in the C-terminal domain                                                                                                                                                               |
| Gallo_2249 | One TM                          | 186-SDSNNASTSYSVVH <b>SSSSTTTDSTSSSESSSTSESSSEED</b> -226                                                                                                                                             |
| prkC       | Protein kinase (1 TM)           | 597- <b>SSSSSESSEKESSSSSSSTDDSSSSTETSDEZ</b>                                                                                                                                                          |

---

1 Other characteristics are indicated like the prediction of transmembrane domains (TM)

2 The putative lipo-box is indicated in blue and the serine rich regions in red. Numbers indicate the position in the protein and Z the C-terminal end.

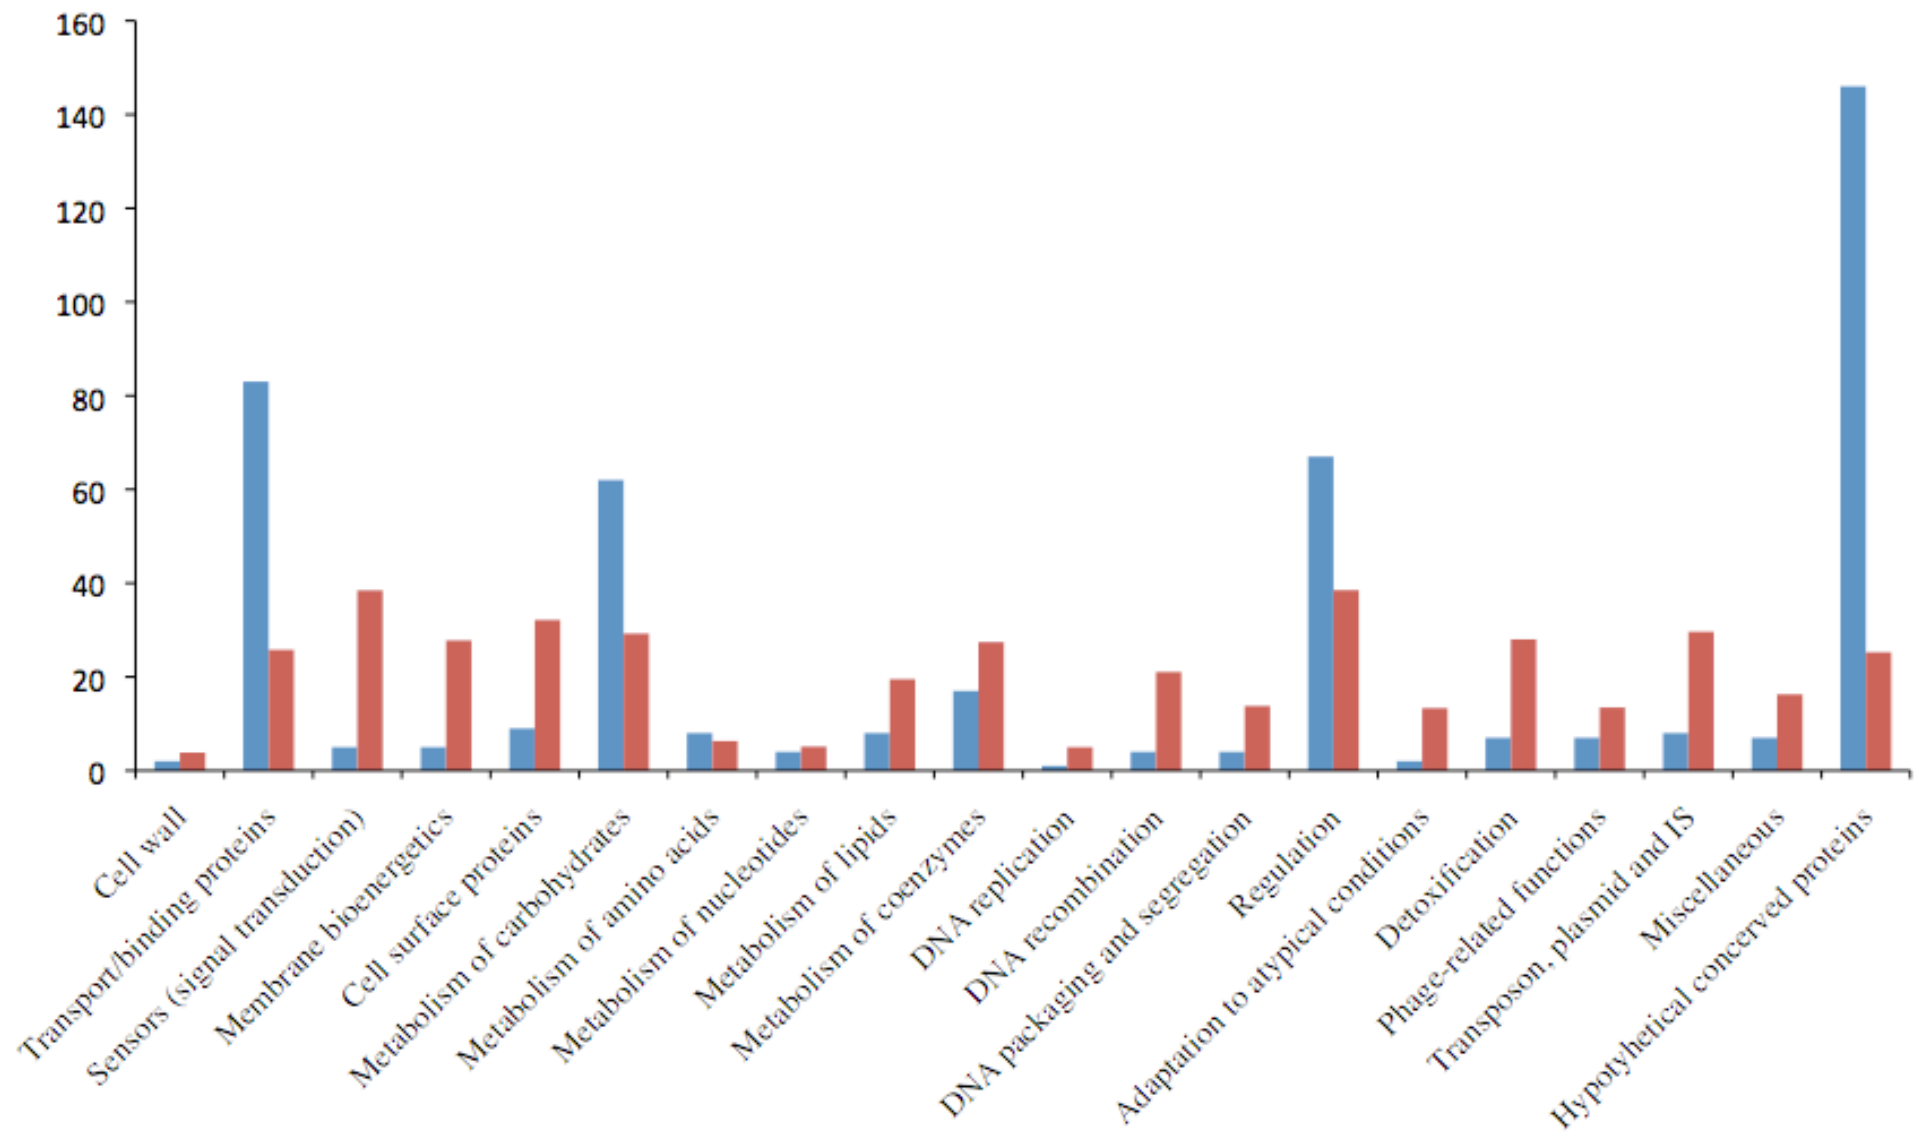

Figure S1:

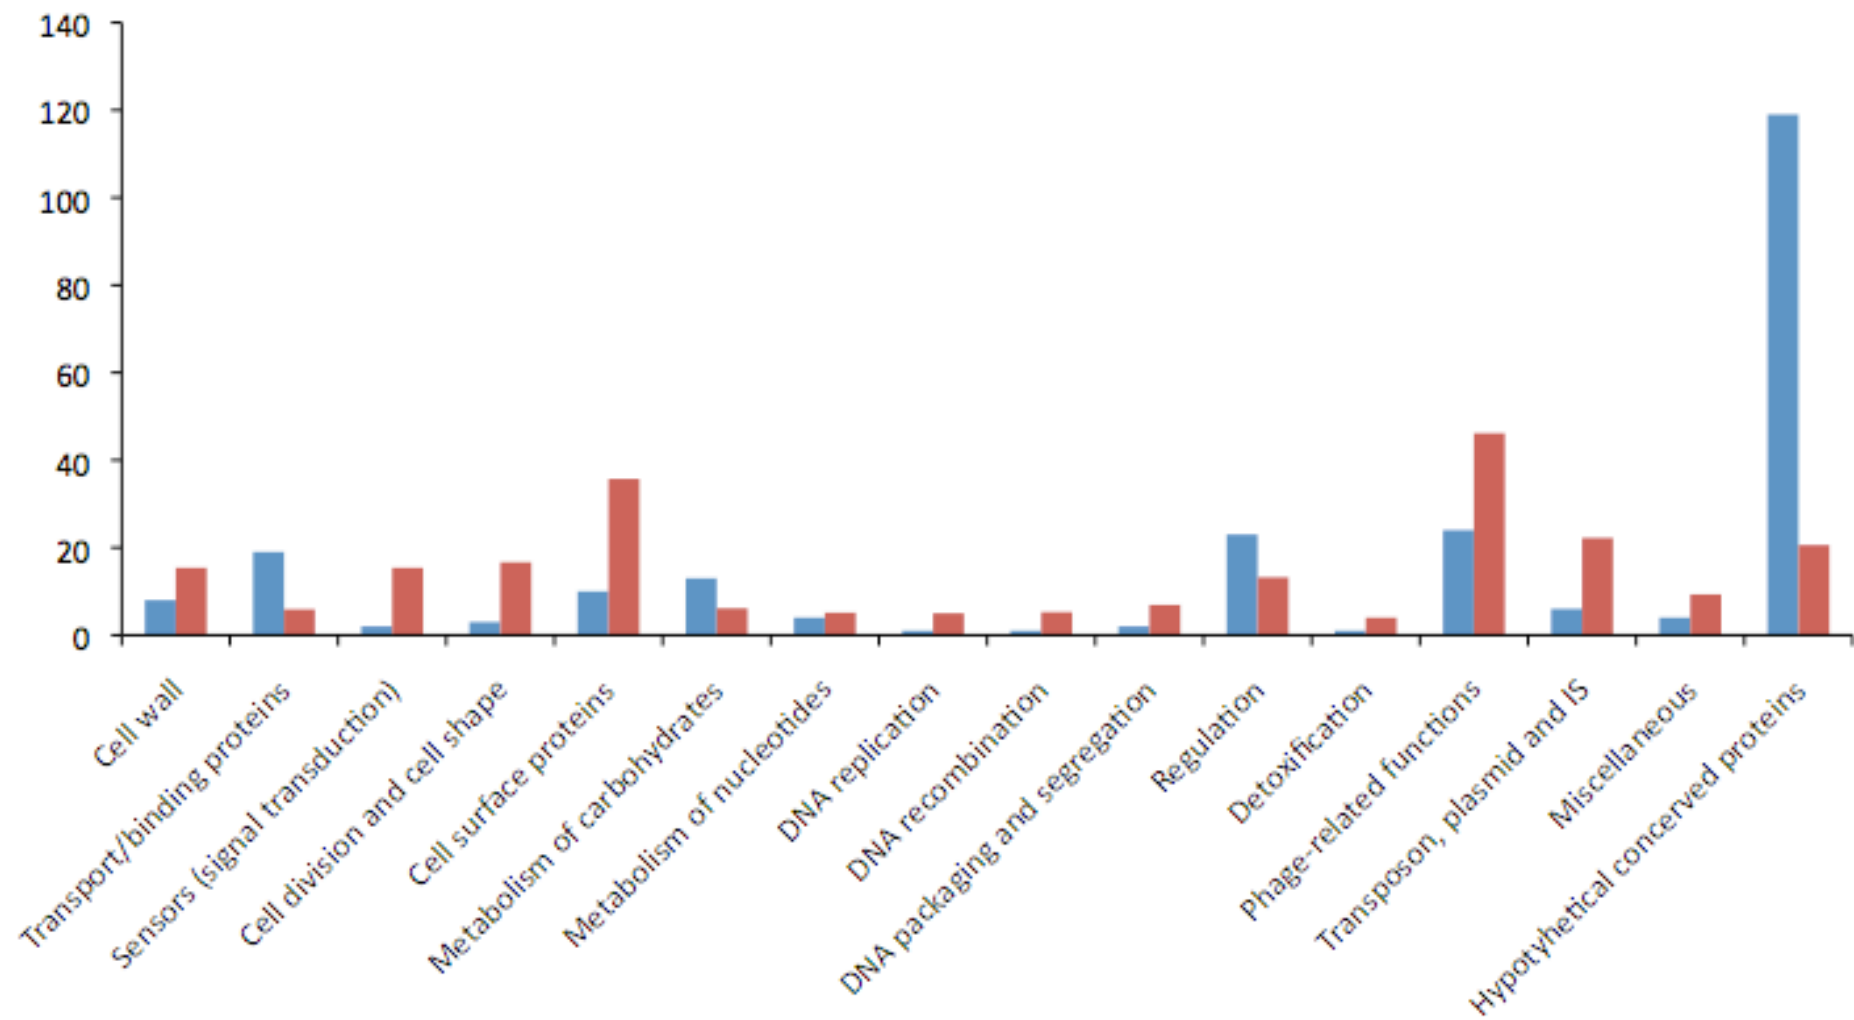

Figure S2:

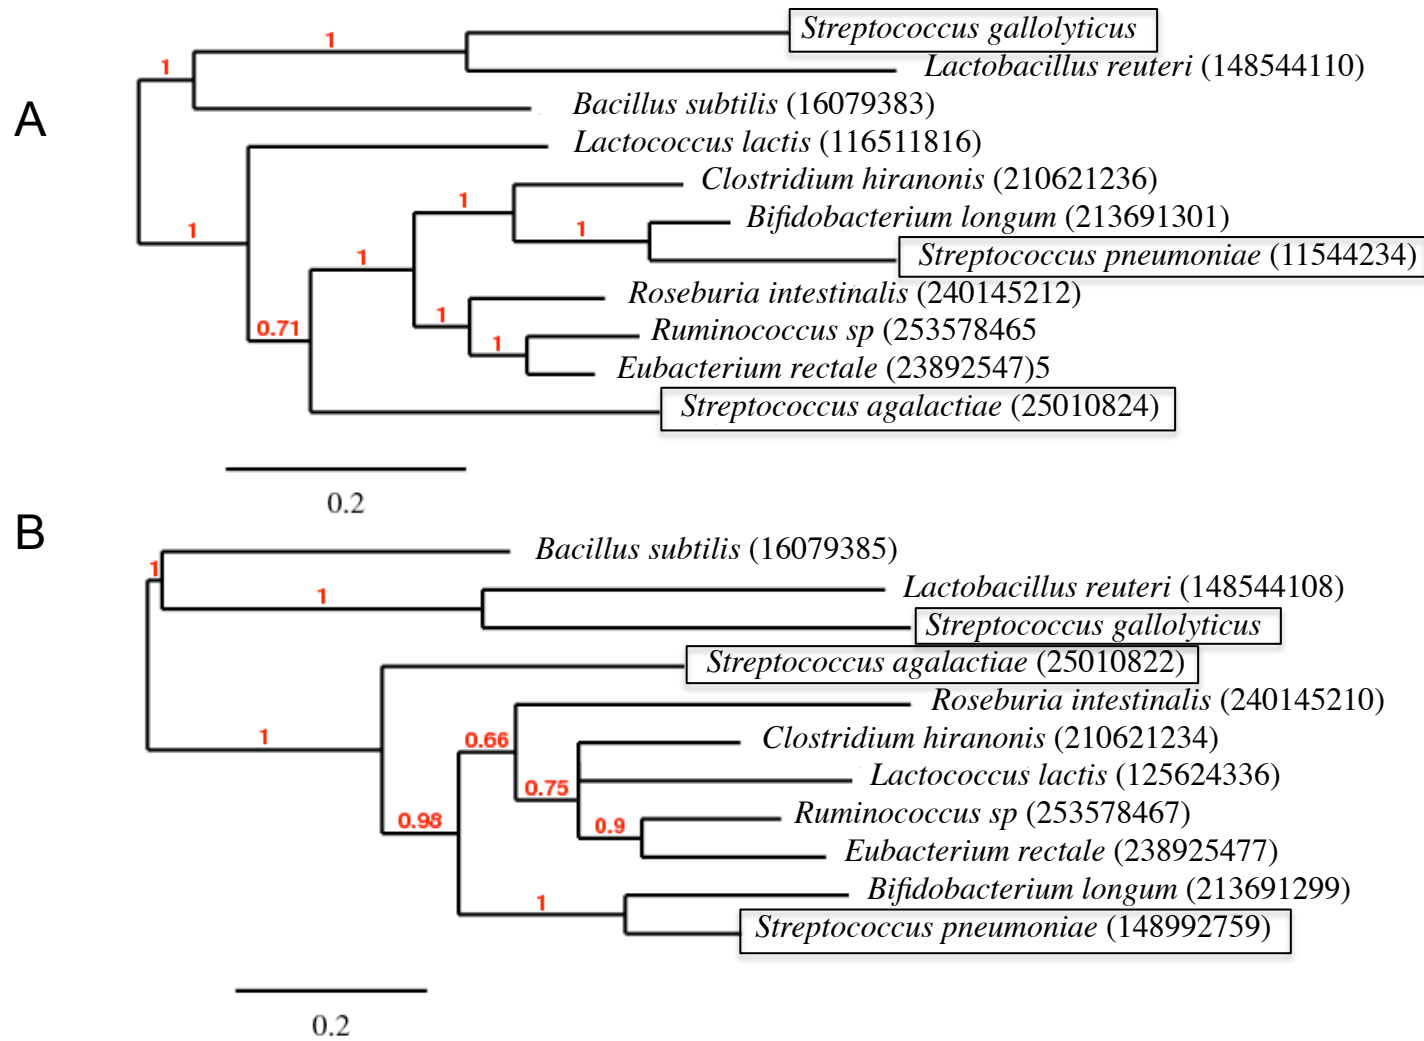

Figure S3:
